# Supplementary material for: Opioids for Treatment of Pre-hospital Acute Pain: A Systematic Review
Source: PubMed Central journal article supplement — Pain Ther. 2022 Jan 18;11(1):17–36. doi: 10.1007/s40122-021-00346-w (PMC8861251; doi:10.1007/s40122-021-00346-w), 2022-01-18
Supplement: 40122_2021_346_MOESM1_ESM.pdf [file 40122_2021_346_MOESM1_ESM.pdf]

# Opioids for Treatment of Pre-hospital Acute Pain: A Systematic Review

Kristian Dahl Friesgaard<sup>1,2,3</sup>, Gunn Elisabeth Vist<sup>4</sup>, Per Kristian Hyldmo<sup>5,6,7</sup>, Lasse Raatiniemi<sup>8,9</sup>, Jouni Kurola<sup>10</sup>, Robert Larsen<sup>11</sup>, Poul Kongstad<sup>12</sup>, Vidar Magnusson<sup>13</sup>, Mårten Sandberg<sup>14</sup>, Marius Rehn<sup>5,6,14</sup>, Leif Rognås<sup>3,15,16</sup>

<sup>1</sup>Research Department, Prehospital Emergency Medical Service, Central Denmark Region, Aarhus, Denmark; <sup>2</sup>Department of Anaesthesiology, Regional Hospital of Horsens, Denmark; <sup>3</sup>Department of Anaesthesiology, Aarhus University Hospital, Aarhus, Denmark; <sup>4</sup>Division for Health Services, Norwegian Institute of Public Health, Oslo, Norway; <sup>5</sup>Faculty of Health Sciences, University of Stavanger, Stavanger, Norway; <sup>6</sup>Department of Research, Norwegian Air Ambulance Foundation, Oslo, Norway; <sup>7</sup>Trauma Unit, Sørlandet Hospital, Kristiansand, Norway; <sup>8</sup>Centre for Prehospital Emergency Care, Oulu University Hospital, Oulu, Finland; <sup>9</sup>*Anaesthesia Research group, MRC, Oulu University Hospital and University of Oulu, Finland*; <sup>10</sup>Centre for Prehospital Emergency Medicine, Kuopio University Hospital and University of Eastern Finland, Kuopio, Finland; <sup>11</sup> Department of Biomedical and Clinical Sciences (BKV), Linköping University, Linköping, Sweden; <sup>12</sup>Department of Prehospital Care and Disaster Medicine, Region of Skåne, Lund, Sweden; <sup>13</sup>Landspítalinn University Hospital, Reykjavik, Iceland; <sup>14</sup>Division of Prehospital Services, Air Ambulance Department, Oslo University Hospital, Oslo, Norway; <sup>15</sup>Department of Clinical Medicine, Aarhus University, Aarhus, Denmark; <sup>16</sup>Danish Air Ambulance, Aarhus, Denmark;

## **Corresponding author:**

Kristian Dahl Friesgaard  
MD, PhD  
Research Department, Prehospital Emergency Medical Service  
Central Denmark Region  
Olof Palmes Allé 34  
8200 Aarhus N, Denmark

E-mail: [k.friesgaard@me.com](mailto:k.friesgaard@me.com)

## Search terms APPENDIX

### Opioids:

#### Medline via PubMed

- #01 opioid\*[Text Word]
- #02 "analgesics, opioid"[Pharmacological Action]
- #03 analgesics, opioid[MeSH Terms]
- #04 #1 OR #2 OR #3
- #05 emergency medical services[MeSH Terms]
- #06 ambulances[MeSH Terms]
- #07 ambulance\*[Text Word]
- #08 prehospital[Text Word]
- #09 pre-hospital[Text Word]
- #10 out-of-hospital[Text Word]
- #11 paramed\*[Text Word]
- #12 emergency medical technicians[MeSH Terms]
- #13 Military Medicine[MeSH Terms]
- #14 Emergency Services, Hospital[MeSH Terms]
- #15 Emergency Responders[MeSH Terms]
- #16 #5 OR #6 OR #7 OR #8 OR #9 OR #10 OR #11 OR #12 OR #13 OR #14 OR #15
- #17 danish[Language]
- #18 norwegian[Language]
- #19 swedish[Language]
- #20 english[Language]
- #21 #17 OR #18 OR #19 OR #20
- #22 #4 AND #16 AND #21
- #23 animals[MeSH Terms]
- #24 humans[MeSH Terms]
- #25 #23 NOT #24
- #26#22 NOT #25 (I alt 1647) Søgning afsluttet 9. april 2018

### **Centre for Reviews and Dissemination:**

1 MeSH DESCRIPTOR Analgesics, Opioid EXPLODE ALL TREES 570  
2 (opiod\*) 834  
3 #1 OR #2 927  
4 MeSH DESCRIPTOR Emergency Medical Technicians EXPLODE ALL TREES 19  
5 MeSH DESCRIPTOR Ambulances EXPLODE ALL TREES 41  
6 MeSH DESCRIPTOR Emergency Medical Services EXPLODE ALL TREES 824  
7 (paramed\*) 78  
8 ("out-of-hospital") 122  
9 (prehospital) 85  
10 (pre-hospital) 93  
11 (ambulance\*) 164  
12 #4 OR #5 OR #6 OR #7 OR #8 OR #9 OR #10 OR #11 1080  
13 #3 AND #12 14

### **Cochrane:**

Date Run: 28/02/18 07:34:59.192

|                                                                       |       |
|-----------------------------------------------------------------------|-------|
| #1 MeSH descriptor: [Analgesics, Opioid] explode all trees            | 6425  |
| #2 opiod*                                                             | 15575 |
| #3 #1 or #2                                                           | 15575 |
| #4 MeSH descriptor: [Emergency Medical Technicians] explode all trees | 159   |
| #5 MeSH descriptor: [Ambulances] explode all trees                    | 165   |
| #6 paramed*                                                           | 1069  |
| #7 out-of-hospital                                                    | 1239  |
| #8 pre-hospital                                                       | 482   |
| #9 prehospital                                                        | 1046  |
| #10 ambulance*                                                        | 815   |
| #11 #4 or #5 or #6 or #7 or #8 or #9 or #10                           | 3585  |
| #12 #3 and #11                                                        | 82    |

### **Epistemonikos:**

1. (title:((title:(prehospital) OR abstract:(prehospital)))
2. (title:(pre-hospital) OR abstract:(pre-hospital))
3. (title:(out-of-hospital) OR abstract:(out-of-hospital))
4. (title:(ambulance\*) OR abstract:(ambulance\*))
5. (title:(paramed\*) OR abstract:(paramed\*))
6. (title:(emergency medical technicians) OR abstract:(emergency medical technicians))
7. (title:(emergency medical services) OR abstract:(emergency medical services)))
8. ((title:(prehospital) OR abstract:(prehospital)))
9. (title:(pre-hospital) OR abstract:(pre-hospital))
10. (title:(out-of-hospital) OR abstract:(out-of-hospital))
11. (title:(ambulance\*) OR abstract:(ambulance\*))
12. (title:(paramed\*) OR abstract:(paramed\*))
13. (title:(emergency medical technicians) OR abstract:(emergency medical technicians))

14. (title:(emergency medical services) OR abstract:(emergency medical services))
15. 1 OR 2 OR 3 OR 4 OR 5 OR 6 OR 7 OR 8 OR 9 OR 10 OR 11 OR 12 OR 13 OR 14
16. ((title:(opioid\*) OR abstract:(opioid\*)))
17. 15 AND 16

## Embase via Ovid

Embase <1974 to 2018 April 09>

Search history sorted by search number ascending

| #  | Searches                                                | Results  |
|----|---------------------------------------------------------|----------|
| 1  | opiate/ 69117                                           |          |
| 2  | narcotic analgesic agent/                               | 19154    |
| 3  | "opioid*".ab,ti.                                        | 98258    |
| 4  | or/1-3                                                  | 146581   |
| 5  | exp emergency health service/                           | 88337    |
| 6  | ambulance/                                              | 11814    |
| 7  | "ambulance*".ab,ti.                                     | 13177    |
| 8  | prehospital.ab,ti.                                      | 13427    |
| 9  | pre-hospital.ab,ti.                                     | 6266     |
| 10 | out-of-hospital.ab,ti.                                  | 13913    |
| 11 | "paramed*".ab,ti.                                       | 14079    |
| 12 | rescue personnel/                                       | 6977     |
| 13 | military medicine/                                      | 25548    |
| 14 | hospital emergency service/                             | 2099     |
| 15 | "emergency responder*".ab,ti.                           | 370      |
| 16 | or/5-15                                                 | 157925   |
| 17 | and/4,16                                                | 1293     |
| 18 | limit 17 to (danish or english or norwegian or swedish) | 1199     |
| 19 | animal/                                                 | 1841500  |
| 20 | human/                                                  | 19360238 |
| 21 | 19 not 20                                               | 1402135  |
| 22 | 18 not 21                                               | 1198     |
